# Supplementary material for: The Effect of Different Rhizobial Symbionts on the Composition and Diversity of Rhizosphere Microorganisms of Chickpea in Different Soils
Source: MDPI journal article supplement (doi:10.3390/plants12193421), 2023-09-28
Supplement: s1 [file s1]

**Table S1.** Comparative experimental design of rhizosphere microbial diversity of chickpea.

| Sampling sites               | Processing group                            | Amount of inoculum (mL) | Sample code |
|------------------------------|---------------------------------------------|-------------------------|-------------|
| Yinggebao, Xinjiang Province | blank control                               | 1.0 of TY broth         | YRASNI      |
|                              | single inoculation USDA 3378 <sup>T</sup>   | 1.0                     | YRAS3378    |
|                              | single inoculation CCBAU 83963 <sup>T</sup> | 1.0                     | YRAS83963   |
|                              | mixed inoculation                           | 0.5 each                | YRASmix     |
| Baicheng, Jilin Province     | blank control                               | 1.0 of TY broth         | BRASNI      |
|                              | single inoculation USDA 3378 <sup>T</sup>   | 1.0                     | BRAS3378    |
|                              | single inoculation CCBAU 83963 <sup>T</sup> | 1.0                     | BRAS83963   |
|                              | mixed inoculation                           | 0.5 each                | BRASmix     |
| Xinyang, Henan Province      | blank control                               | 1.0 of TY broth         | XRASNI      |
|                              | single inoculation USDA 3378 <sup>T</sup>   | 1.0                     | XRAS3378    |
|                              | single inoculation CCBAU 83963 <sup>T</sup> | 1.0                     | XRAS83963   |
|                              | mixed inoculation                           | 0.5 each                | XRASmix     |
| Qiubei, Yunnan Province      | blank control                               | 1.0 of TY broth         | QRASNI      |
|                              | single inoculation USDA 3378 <sup>T</sup>   | 1.0                     | QRAS3378    |
|                              | single inoculation CCBAU 83963 <sup>T</sup> | 1.0                     | QRAS83963   |
|                              | mixed inoculation                           | 0.5 each                | QRASmix     |

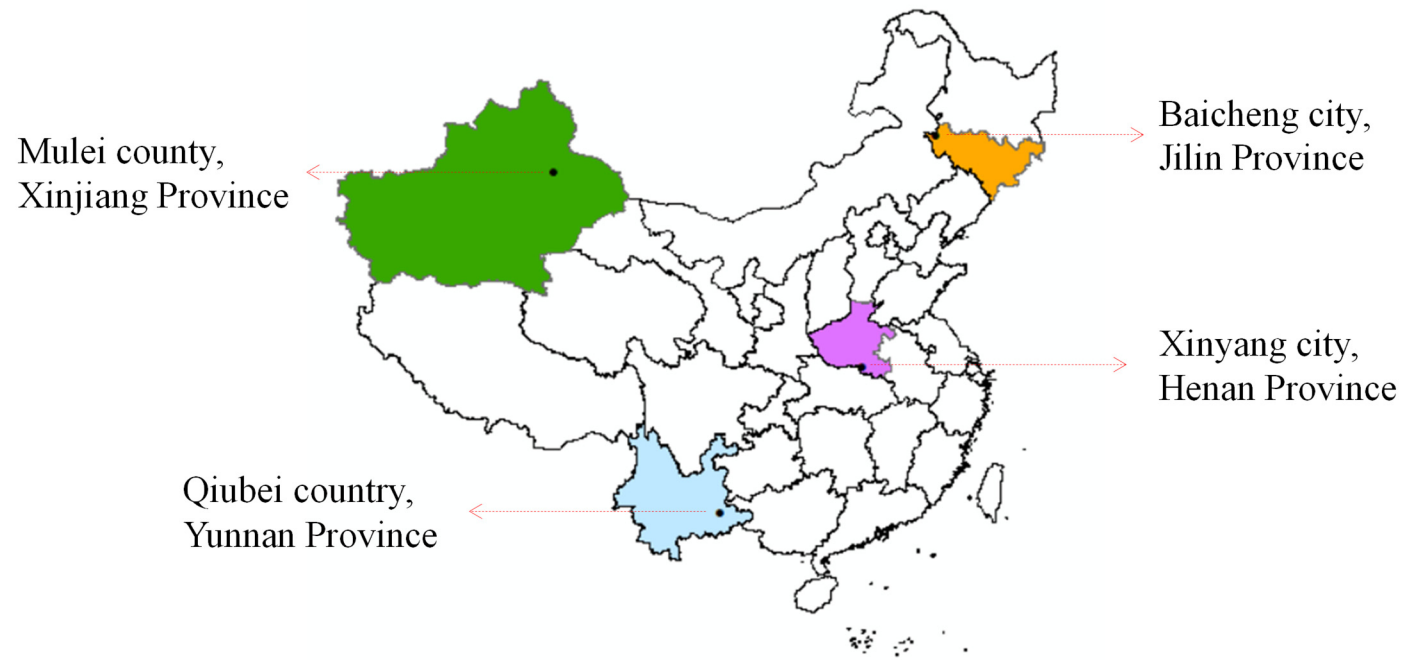

**Supplementary Fig. S1.** The four soil sampling sites from China.

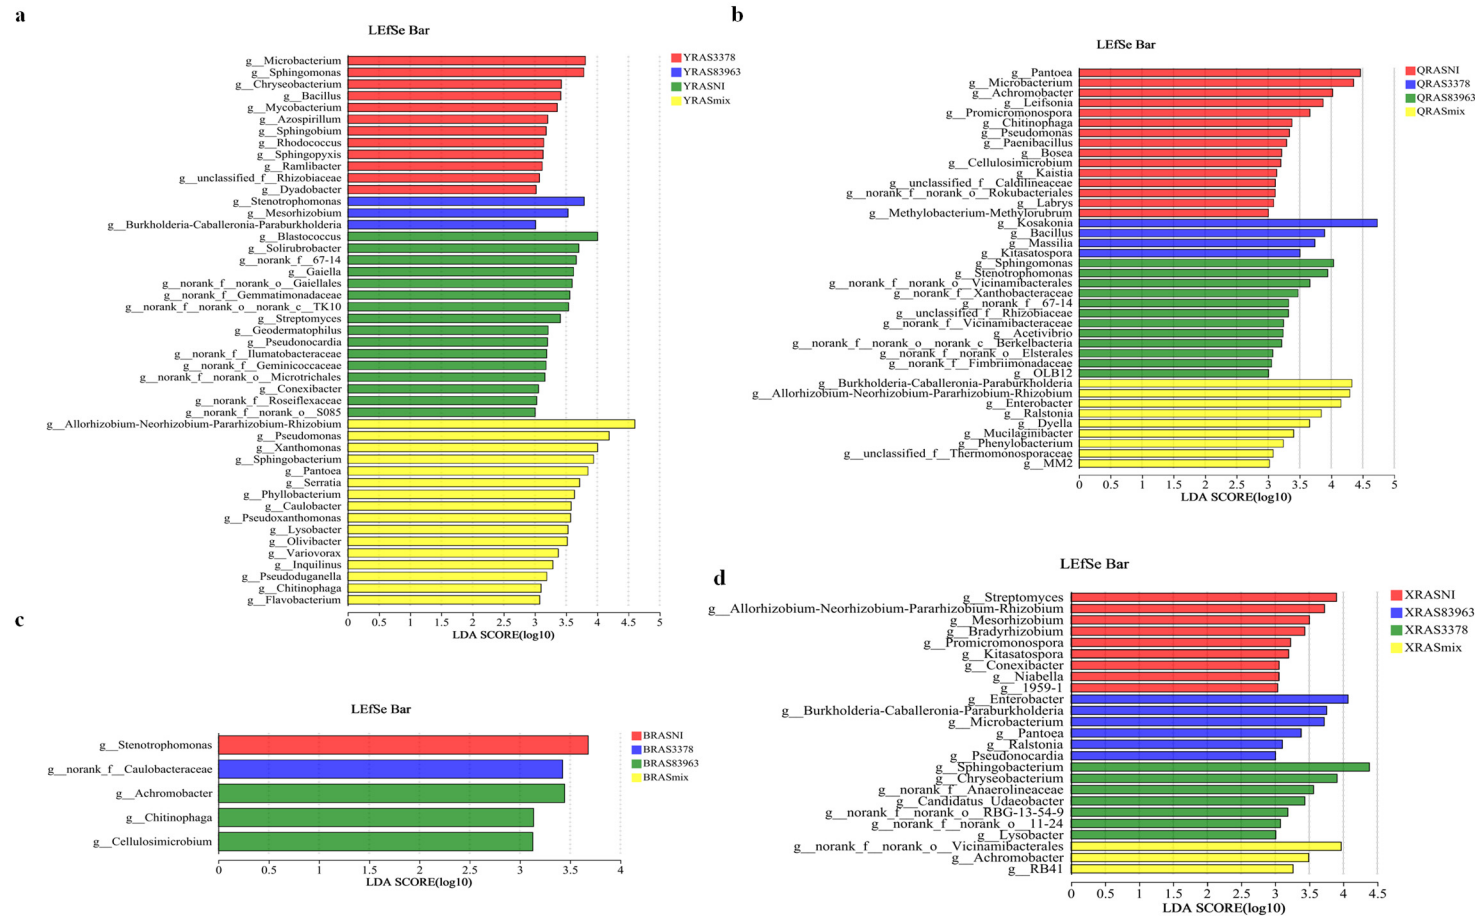

**Supplementary Fig. S2.** Results of LEfSe multi-level species differences in rhizosphere soil microbial genera between the new and old areas of chickpea cultivation. **a:** Yinggebao of Xinjiang Province. **b:** Qiubei of Yunnan Province. **c:** Baicheng of Jilin Province. **d:** Xinyang of Henan Province. Different colors represent significant relative abundance in rhizosphere soil samples under different treatments. Only microorganisms with LDA score >3.0 are displayed for the increased microorganisms.

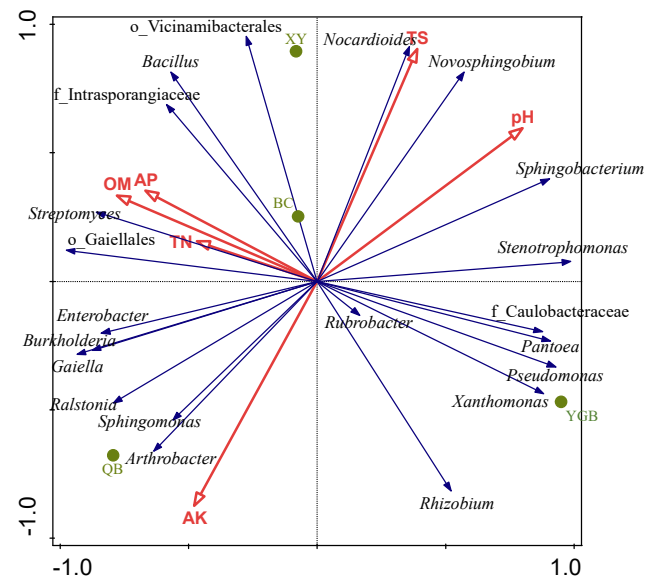

**Supplementary Fig. S3.** The correlation between rhizobial composition and soil characteristics from different sampling sites. The green dots represent different sampling locations. The red arrows represent soil physicochemical factors. The blue arrows represent the most abundant bacterial genera (> 1% relative abundance) in rhizosphere of chickpea grown in different soil samples inoculated with mixture of *M. ciceri* USDA3378<sup>T</sup> and *M. muleiense* CCBAU 83963<sup>T</sup>. The longer the red arrow, the greater the influence of that specific soil property on the distribution of the rhizosphere bacteria; the smaller the angle between the red and blue arrows, the closer the relationship between the soil factor and the rhizosphere bacteria.
